# Supplementary material
Source: publisher figshare collection journal article supplement (https://frontiersin.figshare.com/ndownloader/files/31636121)
Supplement: Supplementary file [file 31636121]

# **Clinical Outcomes of Patients with Primary Membranous Nephropathy and Subnephrotic Proteinuria**

Peng He<sup>1</sup>, Yang Zha<sup>1</sup>, Jing Liu<sup>1</sup>, Hanmin Wang<sup>1</sup>, Lijie He<sup>1,\*</sup>.

<sup>1</sup>Department of Nephrology, Xijing Hospital, the Fourth Military Medical University, Xi'an, Shaan xi, 710032, China.

\*Correspondence should be addressed to 43218204@qq.com (L.J.H.)

## **Supplement material**

Table S1. Univariate and multivariate analyses of independent prognostic factors of partial remission

Table S2. Univariate and multivariate analyses of independent prognostic factors of complete remission

Table S3. Univariate and multivariate analyses of independent prognostic factors of nephrotic proteinuria progression

**Table S1.** Univariate and multivariate analyses of independent prognostic factors of partial remission

| Factor                                  | Univariate analysis      |                | Multivariate analysis    |                |
|-----------------------------------------|--------------------------|----------------|--------------------------|----------------|
|                                         | Hazard ratio<br>(95% CI) | <i>P</i> value | Hazard ratio<br>(95% CI) | <i>P</i> value |
| Age                                     | 1.00 (0.99-1.01)         | 0.459          |                          |                |
| Gender, female                          | 1.03 (0.78-1.35)         | 0.861          |                          |                |
| BMI                                     | 1.01 (0.97-1.04)         | 0.789          |                          |                |
| Hypertension                            | 1.05 (0.78-1.42)         | 0.744          |                          |                |
| Diabetes                                | 0.97 (0.57-1.64)         | 0.906          |                          |                |
| Smokers                                 | 0.97 (0.68-1.39)         | 0.867          |                          |                |
| EGFR                                    | 1.00 (0.99-1.01)         | 0.958          |                          |                |
| Serum albumin                           | 1.41 (1.17-1.70)         | <0.001         | 1.20 (0.99-1.46)         | 0.063          |
| Proteinuria                             | 0.96 (0.81-1.13)         | 0.599          |                          |                |
| Microhematuria                          | 0.99 (0.97-1.00)         | 0.140          |                          |                |
| High level of serum anti-PLA2R antibody | 0.79 (0.59-1.08)         | 0.137          |                          |                |
| High intensity of IF-PLA2R staining     | 1.13 (0.82-1.56)         | 0.462          |                          |                |
| High intensity of IF-C3 staining        | 0.91 (0.59-1.41)         | 0.679          |                          |                |
| Initial proteinuria                     | 0.64 (0.54-0.76)         | <0.001         | 0.67 (0.56-0.80)         | <0.001         |
| Initial microhematuria                  | 0.97 (0.94-1.01)         | 0.126          |                          |                |
| Treatment with ACEI/ARB                 | 1.40 (0.90-2.18)         | 0.141          |                          |                |
| Treatment with statin                   | 0.90 (0.68-1.20)         | 0.477          |                          |                |
| Treatment with corticosteroids          | 0.89 (0.66-1.18)         | 0.410          |                          |                |
| Treatment with cyclophosphamide         | 0.86 (0.63-1.18)         | 0.357          |                          |                |
| Treatment with tacrolimus               | 0.94 (0.70-1.25)         | 0.666          |                          |                |

MN, membranous nephropathy; CI, confidence interval; BMI, body mass index; eGFR, estimated glomerular filtration rate; PLA2R, phospholipase A2 receptor; IF, immunofluorescence; ACEI, angiotensin converting enzyme inhibitor; ARB, angiotensin receptor blockers.

**Table S2.** Univariate and multivariate analyses of independent prognostic factors of complete remission

| Factor                                  | Univariate analysis      |                | Multivariate analysis    |                |
|-----------------------------------------|--------------------------|----------------|--------------------------|----------------|
|                                         | Hazard ratio<br>(95% CI) | <i>P</i> value | Hazard ratio<br>(95% CI) | <i>P</i> value |
| Age                                     | 0.99 (0.98-1.00)         | 0.037          | 0.99 (0.98-1.00)         | 0.194          |
| Gender, female                          | 1.16 (0.85-1.57)         | 0.347          |                          |                |
| BMI                                     | 0.98 (0.94-1.02)         | 0.284          |                          |                |
| Hypertension                            | 0.96 (0.69-1.34)         | 0.828          |                          |                |
| Diabetes                                | 0.75 (0.41-1.38)         | 0.354          |                          |                |
| Smokers                                 | 1.02 (0.68-1.51)         | 0.936          |                          |                |
| EGFR                                    | 1.00 (0.99-1.01)         | 0.590          |                          |                |
| Serum albumin                           | 1.00 (0.81-1.23)         | 0.980          |                          |                |
| Proteinuria                             | 0.84 (0.70-1.00)         | 0.056          |                          |                |
| Microhematuria                          | 1.01 (0.99-1.02)         | 0.477          |                          |                |
| High level of serum anti-PLA2R antibody | 0.85 (0.61-1.18)         | 0.328          |                          |                |
| High intensity of IF-PLA2R staining     | 1.08 (0.76-1.55)         | 0.659          |                          |                |
| High intensity of IF-C3 staining        | 0.95 (0.59-1.52)         | 0.823          |                          |                |
| Initial proteinuria                     | 0.56 (0.45-0.70)         | <0.001         | 0.50 (0.40-0.63)         | <0.001         |
| Initial microhematuria                  | 1.00 (0.96-1.04)         | 0.964          |                          |                |
| Treatment with ACEI/ARB                 | 0.85 (0.53-1.34)         | 0.473          |                          |                |
| Treatment with statin                   | 0.88 (0.65-1.21)         | 0.438          |                          |                |
| Treatment with corticosteroids          | 1.57 (1.13-2.18)         | 0.008          | 2.02 (1.43-2.85)         | <0.001         |
| Treatment with cyclophosphamide         | 1.07 (0.77-1.49)         | 0.704          |                          |                |
| Treatment with tacrolimus               | 1.14 (0.84-1.54)         | 0.416          |                          |                |

MN, membranous nephropathy; CI, confidence interval; BMI, body mass index; eGFR, estimated glomerular filtration rate; PLA2R, phospholipase A2 receptor; IF, immunofluorescence; ACEI, angiotensin converting enzyme inhibitor; ARB, angiotensin receptor blockers.

**Table S3.** Univariate and multivariate analyses of independent prognostic factors of nephrotic proteinuria progression

| Factor                                  | Univariate analysis      |                | Multivariate analysis    |                |
|-----------------------------------------|--------------------------|----------------|--------------------------|----------------|
|                                         | Hazard ratio<br>(95% CI) | <i>P</i> value | Hazard ratio<br>(95% CI) | <i>P</i> value |
| Age                                     | 0.99 (0.97-1.00)         | 0.129          |                          |                |
| Gender, female                          | 0.54 (0.31-0.94)         | 0.029          | 0.49 (0.28-0.87)         | 0.016          |
| BMI                                     | 1.05 (0.98-1.13)         | 0.197          |                          |                |
| Hypertension                            | 0.70 (0.37-1.31)         | 0.262          |                          |                |
| Diabetes                                | 0.22 (0.03-1.62)         | 0.138          |                          |                |
| Smokers                                 | 1.07 (0.54-2.12)         | 0.854          |                          |                |
| EGFR                                    | 1.01 (1.00-1.03)         | 0.076          |                          |                |
| Serum albumin                           | 0.62 (0.43-0.90)         | 0.011          | 0.84 (0.57-1.25)         | 0.392          |
| Proteinuria                             | 1.37 (1.01-1.86)         | 0.043          |                          |                |
| Microhematuria                          | 1.02 (1.00-1.04)         | 0.058          |                          |                |
| High level of serum anti-PLA2R antibody | 1.21 (0.68-2.17)         | 0.520          |                          |                |
| High intensity of IF-PLA2R staining     | 0.88 (0.47-1.65)         | 0.694          |                          |                |
| High intensity of IF-C3 staining        | 1.10 (0.49-2.49)         | 0.811          |                          |                |
| Initial proteinuria                     | 2.93 (2.22-3.88)         | <0.001         | 2.97 (2.23-3.97)         | <0.001         |
| Initial microhematuria                  | 1.08 (1.03-1.13)         | 0.001          | 1.11 (1.05-1.17)         | <0.001         |
| Treatment with ACEI/ARB                 | 0.74 (0.35-1.57)         | 0.432          |                          |                |
| Treatment with statin                   | 1.43 (0.80-2.55)         | 0.223          |                          |                |
| Treatment with corticosteroids          | 0.99 (0.56-1.74)         | 0.960          |                          |                |
| Treatment with cyclophosphamide         | 0.86 (0.47-1.59)         | 0.639          |                          |                |
| Treatment with tacrolimus               | 1.59 (0.92-2.74)         | 0.094          |                          |                |

MN, membranous nephropathy; CI, confidence interval; BMI, body mass index; eGFR, estimated glomerular filtration rate; PLA2R, phospholipase A2 receptor; IF, immunofluorescence; ACEI, angiotensin converting enzyme inhibitor; ARB, angiotensin receptor blockers.
